# Supplementary material for: Phase II study of α-galactosylceramide-pulsed antigen-presenting cells in patients with advanced or recurrent non-small cell lung cancer
Source: PubMed Central journal article supplement — J Immunother Cancer. 2020 Mar 17;8(1):e000316. doi: 10.1136/jitc-2019-000316 (PMC7078938; doi:10.1136/jitc-2019-000316), 2020-03-17
Supplement: jitc-2019-000316supp001.pdf [file jitc-2019-000316supp001.pdf]

**Supplemental Table 1. Summary of surface expression profiles of antigen presenting cells**

|        |       | mean | SD   | minimum | maximum |
|--------|-------|------|------|---------|---------|
| HLA-DR | APC#1 | 57.4 | 24.1 | 10.0    | 93.1    |
|        | APC#2 | 64.9 | 26.2 | 9.2     | 98.2    |
|        | APC#3 | 59.0 | 22.4 | 16.8    | 91.0    |
|        | APC#4 | 65.0 | 26.3 | 6.5     | 98.2    |
| CD86   | APC#1 | 53.8 | 23.8 | 15.3    | 90.1    |
|        | APC#2 | 76.9 | 19.7 | 28.4    | 96.9    |
|        | APC#3 | 67.1 | 16.2 | 26.8    | 89.2    |
|        | APC#4 | 89.8 | 6.8  | 72.5    | 99.1    |
| CD11c  | APC#1 | 22.4 | 11.5 | 5.1     | 53.4    |
|        | APC#2 | 24.0 | 11.1 | 5.6     | 50.1    |
|        | APC#3 | 22.3 | 9.7  | 7.9     | 42.2    |
|        | APC#4 | 28.9 | 15.8 | 5.8     | 62.1    |
| CD40   | APC#1 | 20.4 | 16.7 | 1.6     | 54.7    |
|        | APC#2 | 20.3 | 19.0 | 0.7     | 75.1    |
|        | APC#3 | 20.0 | 17.4 | 1.0     | 58.8    |
|        | APC#4 | 16.2 | 18.2 | 0.1     | 68.7    |
| CD1d   | APC#1 | 35.0 | 13.8 | 9.3     | 65.4    |
|        | APC#2 | 33.7 | 12.2 | 8.1     | 61.5    |
|        | APC#3 | 35.9 | 13.3 | 12.7    | 58.7    |
|        | APC#4 | 36.4 | 14.8 | 7.7     | 73.7    |
| CD14   | APC#1 | 3.1  | 2.7  | 0.2     | 9.6     |
|        | APC#2 | 2.4  | 2.2  | 0.2     | 8.5     |
|        | APC#3 | 2.6  | 2.9  | 0.4     | 14.8    |
|        | APC#4 | 3.0  | 2.8  | 0.3     | 10.4    |

**Supplemental Table 2. Grade 3 or 4 adverse events**

| Event                   | Grade | Total number (%) |
|-------------------------|-------|------------------|
| Tumor pain              | 3     | 1 (2.9)          |
| Serum amylase increased | 3     | 3 (8.6)          |
| Hypertension            | 3     | 1 (2.9)          |

**Supplemental Table 3. All adverse events occurred during the treatment period**

|                                    | Grade 1          | Grade 2         | Grade 3         | Grade 4        | Grade 5        |
|------------------------------------|------------------|-----------------|-----------------|----------------|----------------|
|                                    | Number (%)       | Number (%)      | Number (%)      | Number (%)     | Number (%)     |
| <b>Total (%)</b>                   | <b>25 (71.4)</b> | <b>4 (11.4)</b> | <b>5 (14.3)</b> | <b>0 (0.0)</b> | <b>0 (0.0)</b> |
| <b>Supra-ordinate Terms</b>        |                  |                 |                 |                |                |
| <b>Short AE name</b>               |                  |                 |                 |                |                |
| Blood / Bone marrow                | 1 (2.9)          | 0 (0.0)         | 0 (0.0)         | 0 (0.0)        | 0 (0.0)        |
| Hemoglobin                         | 1 (2.9)          | 0 (0.0)         | 0 (0.0)         | 0 (0.0)        | 0 (0.0)        |
| Cardiac general                    | 0 (0.0)          | 0 (0.0)         | 1 (2.9)         | 0 (0.0)        | 0 (0.0)        |
| Hypertension                       | 0 (0.0)          | 0 (0.0)         | 1 (2.9)         | 0 (0.0)        | 0 (0.0)        |
| Constitutional symptoms            | 10 (28.6)        | 1 (2.9)         | 0 (0.0)         | 0 (0.0)        | 0 (0.0)        |
| Fatigue                            | 6 (17.1)         | 0 (0.0)         | 0 (0.0)         | 0 (0.0)        | 0 (0.0)        |
| Fever                              | 2 (5.7)          | 1 (2.9)         | 0 (0.0)         | 0 (0.0)        | 0 (0.0)        |
| Rigors                             | 1 (2.9)          | 0 (0.0)         | 0 (0.0)         | 0 (0.0)        | 0 (0.0)        |
| Mass                               | 1 (2.9)          | 0 (0.0)         | 0 (0.0)         | 0 (0.0)        | 0 (0.0)        |
| Dermatology / Skin                 | 5 (14.3)         | 0 (0.0)         | 0 (0.0)         | 0 (0.0)        | 0 (0.0)        |
| Night sweats                       | 1 (2.9)          | 0 (0.0)         | 0 (0.0)         | 0 (0.0)        | 0 (0.0)        |
| Papilloma                          | 1 (2.9)          | 0 (0.0)         | 0 (0.0)         | 0 (0.0)        | 0 (0.0)        |
| Patchy rash                        | 1 (2.9)          | 0 (0.0)         | 0 (0.0)         | 0 (0.0)        | 0 (0.0)        |
| Rush                               | 1 (2.9)          | 0 (0.0)         | 0 (0.0)         | 0 (0.0)        | 0 (0.0)        |
| Skin exfoliative                   | 1 (2.9)          | 0 (0.0)         | 0 (0.0)         | 0 (0.0)        | 0 (0.0)        |
| Gastrointestinal                   | 2 (5.7)          | 1 (2.9)         | 0 (0.0)         | 0 (0.0)        | 0 (0.0)        |
| Anorexia                           | 1 (2.9)          | 0 (0.0)         | 0 (0.0)         | 0 (0.0)        | 0 (0.0)        |
| Constipation                       | 0 (0.0)          | 1 (2.9)         | 0 (0.0)         | 0 (0.0)        | 0 (0.0)        |
| Diarrhea                           | 1 (2.9)          | 0 (0.0)         | 0 (0.0)         | 0 (0.0)        | 0 (0.0)        |
| Infection                          | 1 (2.9)          | 0 (0.0)         | 0 (0.0)         | 0 (0.0)        | 0 (0.0)        |
| Infection-Others (Influenza virus) | 1 (2.9)          | 0 (0.0)         | 0 (0.0)         | 0 (0.0)        | 0 (0.0)        |
| Laboratory                         | 24 (68.6)        | 0 (0.0)         | 3 (8.6)         | 0 (0.0)        | 0 (0.0)        |
| C-reactive protein increase        | 11 (31.4)        | 0 (0.0)         | 0 (0.0)         | 0 (0.0)        | 0 (0.0)        |
| Creatinine increase                | 4 (11.4)         | 0 (0.0)         | 0 (0.0)         | 0 (0.0)        | 0 (0.0)        |
| Glutamyl transpeptidase increase   | 4 (11.4)         | 0 (0.0)         | 0 (0.0)         | 0 (0.0)        | 0 (0.0)        |

|                                               |           |         |         |         |         |
|-----------------------------------------------|-----------|---------|---------|---------|---------|
| Hyperbilirubinemia                            | 1 (2.9)   | 0 (0.0) | 0 (0.0) | 0 (0.0) | 0 (0.0) |
| Lactate dehydrogenase increase                | 14 (40.0) | 0 (0.0) | 0 (0.0) | 0 (0.0) | 0 (0.0) |
| Platelet increase                             | 1 (2.9)   | 0 (0.0) | 0 (0.0) | 0 (0.0) | 0 (0.0) |
| Serum alanine aminotransferase increase       | 1 (2.9)   | 0 (0.0) | 0 (0.0) | 0 (0.0) | 0 (0.0) |
| Serum amylase increase                        | 1 (2.9)   | 0 (0.0) | 3 (8.6) | 0 (0.0) | 0 (0.0) |
| Serum aspartic acid aminotransferase decrease | 1 (2.9)   | 0 (0.0) | 0 (0.0) | 0 (0.0) | 0 (0.0) |
| Serum aspartic acid aminotransferase increase | 2 (5.7)   | 0 (0.0) | 0 (0.0) | 0 (0.0) | 0 (0.0) |
| Urea increase                                 | 5 (14.3)  | 0 (0.0) | 0 (0.0) | 0 (0.0) | 0 (0.0) |
| Metabolic                                     | 17 (48.6) | 2 (5.7) | 0 (0.0) | 0 (0.0) | 0 (0.0) |
| Hyperchloremia                                | 7 (20.0)  | 0 (0.0) | 0 (0.0) | 0 (0.0) | 0 (0.0) |
| Hyperkalemia                                  | 4 (11.4)  | 2 (5.7) | 0 (0.0) | 0 (0.0) | 0 (0.0) |
| Hypoalbuminemia                               | 6 (17.1)  | 0 (0.0) | 0 (0.0) | 0 (0.0) | 0 (0.0) |
| Hypocalcemia                                  | 1 (2.9)   | 0 (0.0) | 0 (0.0) | 0 (0.0) | 0 (0.0) |
| Hypochloremia                                 | 1 (2.9)   | 0 (0.0) | 0 (0.0) | 0 (0.0) | 0 (0.0) |
| Hyponatremia                                  | 2 (5.7)   | 0 (0.0) | 0 (0.0) | 0 (0.0) | 0 (0.0) |
| Hypoproteinemia                               | 6 (17.1)  | 0 (0.0) | 0 (0.0) | 0 (0.0) | 0 (0.0) |
| Neurology                                     | 7 (20.0)  | 0 (0.0) | 0 (0.0) | 0 (0.0) | 0 (0.0) |
| Dysesthesia                                   | 7 (20.0)  | 0 (0.0) | 0 (0.0) | 0 (0.0) | 0 (0.0) |
| Pain                                          | 10 (28.6) | 0 (0.0) | 0 (0.0) | 0 (0.0) | 0 (0.0) |
| Pain-Back                                     | 2 (5.7)   | 0 (0.0) | 0 (0.0) | 0 (0.0) | 0 (0.0) |
| Pain-Chest                                    | 1 (2.9)   | 0 (0.0) | 0 (0.0) | 0 (0.0) | 0 (0.0) |
| Pain-Head/Headache                            | 1 (2.9)   | 0 (0.0) | 0 (0.0) | 0 (0.0) | 0 (0.0) |
| Pain-Joint                                    | 1 (2.9)   | 0 (0.0) | 0 (0.0) | 0 (0.0) | 0 (0.0) |
| Pain-Muscle                                   | 1 (2.9)   | 0 (0.0) | 0 (0.0) | 0 (0.0) | 0 (0.0) |
| Pain-Pharynx                                  | 6 (17.1)  | 0 (0.0) | 0 (0.0) | 0 (0.0) | 0 (0.0) |
| Pain-NOS                                      | 2 (5.7)   | 0 (0.0) | 0 (0.0) | 0 (0.0) | 0 (0.0) |
| Pulmonary / Upper respiratory                 | 8 (22.9)  | 1 (2.9) | 0 (0.0) | 0 (0.0) | 0 (0.0) |
| Cough                                         | 6 (17.1)  | 0 (0.0) | 0 (0.0) | 0 (0.0) | 0 (0.0) |
| Dyspnea                                       | 0 (0.0)   | 1 (2.9) | 0 (0.0) | 0 (0.0) | 0 (0.0) |
| Hemorrhage, pulmonary/upper                   | 1 (2.9)   | 0 (0.0) | 0 (0.0) | 0 (0.0) | 0 (0.0) |

---

|                  |         |         |         |         |         |
|------------------|---------|---------|---------|---------|---------|
| respiratory-Lung |         |         |         |         |         |
| Sputum           | 1 (2.9) | 0 (0.0) | 0 (0.0) | 0 (0.0) | 0 (0.0) |

---
